# Supplementary material
Source: Springer Nature journal article supplement (https://www.springermedizin.de/resource/supplementary/12986_2012_455_MOESM1_ESM.pdf/25656122)
Supplement: MOESM1 [file 25656122]

**Supplementary Table 1.** Participants' dietary intake

|                                                | <b>0 g<br/>(n = 10)</b> | <b>W20<br/>(n = 10)</b> | <b>W40<br/>(n = 10)</b> | <b>S20<br/>(n = 10)</b> | <b>S40<br/>(n = 10)</b> |
|------------------------------------------------|-------------------------|-------------------------|-------------------------|-------------------------|-------------------------|
| Total energy (kcal)                            | 2327                    | 2288                    | 2388                    | 2182                    | 2192                    |
| % Target energy                                | 100                     | 98                      | 99                      | 100                     | 100                     |
| Protein (g·kg <sup>-1</sup> ·d <sup>-1</sup> ) | 1.03                    | 1.04                    | 1.03                    | 1.03                    | 1.04                    |
| % Carbohydrate                                 | 59                      | 61                      | 58                      | 59                      | 59                      |
| % Protein                                      | 14                      | 15                      | 14                      | 15                      | 15                      |
| % Fat                                          | 27                      | 24                      | 28                      | 26                      | 26                      |

Dietary intake calculated over 2 days immediately prior to the infusion trial.

Values are means ± SD.
